# Supplementary material
Source: HighWire-hosted journal article supplement (https://thorax.bmj.com/content/thoraxjnl-2020-216331)
Supplement: inline-supplementary-material-1 [file inline-supplementary-material-1.pdf]

**Add-on Azithromycin reduces sputum cytokines in non-eosinophilic asthma: an AMAZES sub-study**

**ONLINE SUPPLEMENT**

## SUPPLEMENTARY METHODS

### Sub-study design

This was a pre-specified sub-study from the initial AMAZES trial protocol (Section 11.2, Appendix I) <https://www.severeasthma.org.au/wp-content/uploads/2017/04/AMAZES-Protocol-V15-25.02.14-final.pdf>

### Inflammatory marker assessment

Sputum IL-6, IL-8 and IL-1 $\beta$  levels were determined by ELISA according to the manufacturer's instructions (R&D Systems; Minneapolis, MS, USA). The validity of IL-6, IL-8 and IL-1 $\beta$  in sputum supernatant has been reported previously.<sup>1-3</sup> The limits of detection of each assay were as following; sputum IL-6: 168.84 pg/ml; IL-8: 31.3 pg/ml; IL-1 $\beta$ : 35.19 pg/ml. IL-6 and IL-1 $\beta$  were assessed in all available sputum supernatant pairs. The abundance of eDNA in the cell-free sputum supernatant was quantitated using the Quant-iT PicoGreen dsDNA Assay Kit (P7589, Invitrogen, Carlsbad, CA) as per manufacturer's instructions.<sup>4</sup> This assay selectively detects double-stranded DNA, which was quantitated in 10  $\mu$ L of sputum supernatant against a DNA standard curve of 0–200 ng/ $\mu$ L.

### *Haemophilus influenzae* detection in raw sputum

The total DNA was extracted from frozen raw sputum aliquots using a combination of physical, enzymatic, and heat-based cell lysis method that was followed by phenol-chloroform extraction and DNA recovery using EZ-10 Spin columns (Bio Basic, Inc.) as previously described.<sup>5</sup> *H. influenzae* abundance was measured using a previously published, validated, species-specific qPCR assay with a standard curve of *H. influenzae* strain NTCC8468 of known quantities.<sup>6,7</sup> Briefly, 1  $\mu$ L of DNA extract, 0.25  $\mu$ M of primers (F: ATTAAATGTTGCATCAACGC, R: GACTTTTGCCCACGCAC), 0.2  $\mu$ M of target probe (FAM-ACGRTTTTACCATAGTTGCACTTTCTC-BHQ1), 17.5  $\mu$ L of 2X KAPA Probe Fast qPCR Master Mix (KAPA Biosystems Inc., Wilmington, USA) and the appropriate volume of water was added to a 35  $\mu$ L total reaction volume. Quantitative real-time PCR were performed on three technical replicates, at 10  $\mu$ L reaction volume per replicate, on a QuantStudio 6 and 7 Flex Real-Time PCR system (Applied Biosystems, Carlsbad, USA). Cycle conditions were 50 cycles of 95  $^{\circ}$ C for 10 s and 63  $^{\circ}$ C for 30 s. Serial dilutions of a known concentration of *H. influenzae* strain NTCC8468 was run with every PCR reaction and a copy number per mL of sputum was calculated by comparing sample Ct to the standard curve.

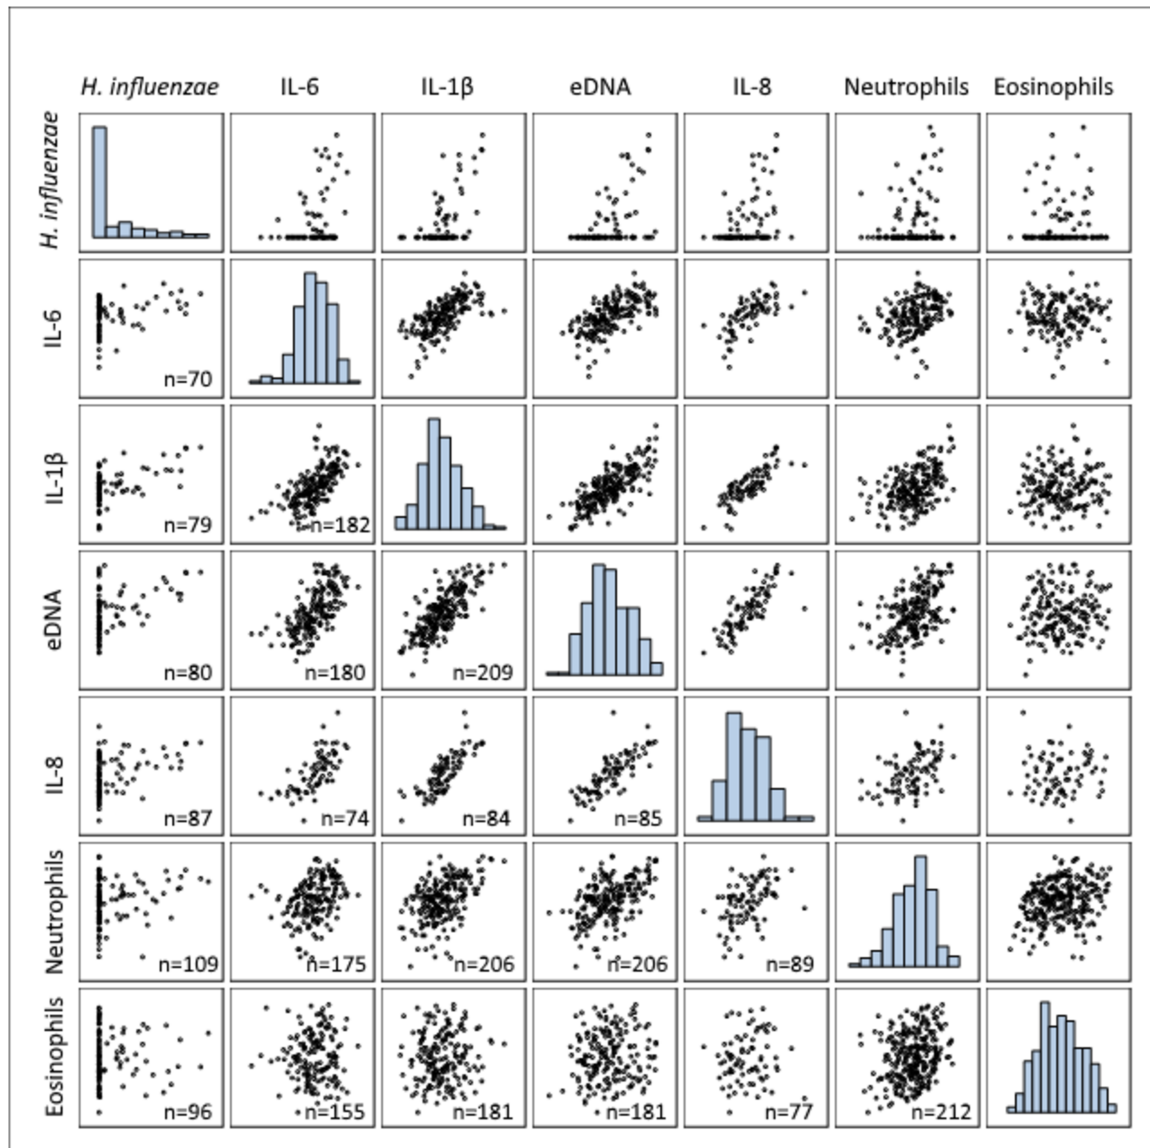

**Supplementary Figure 1:** Scatter plot matrix of inflammatory mediators and *Haemophilus influenzae* in all participants. X-axis from left to right and y-axis from top to bottom display  $\log_{10}$  values of *H. influenzae* (copies/mL), IL-6 (pg/mL), IL-1 $\beta$  (pg/mL), extracellular DNA (ng/mL), IL-8 (pg/mL), neutrophils (count  $\times 10^4$ /mL), and eosinophils (count  $\times 10^4$ /mL)

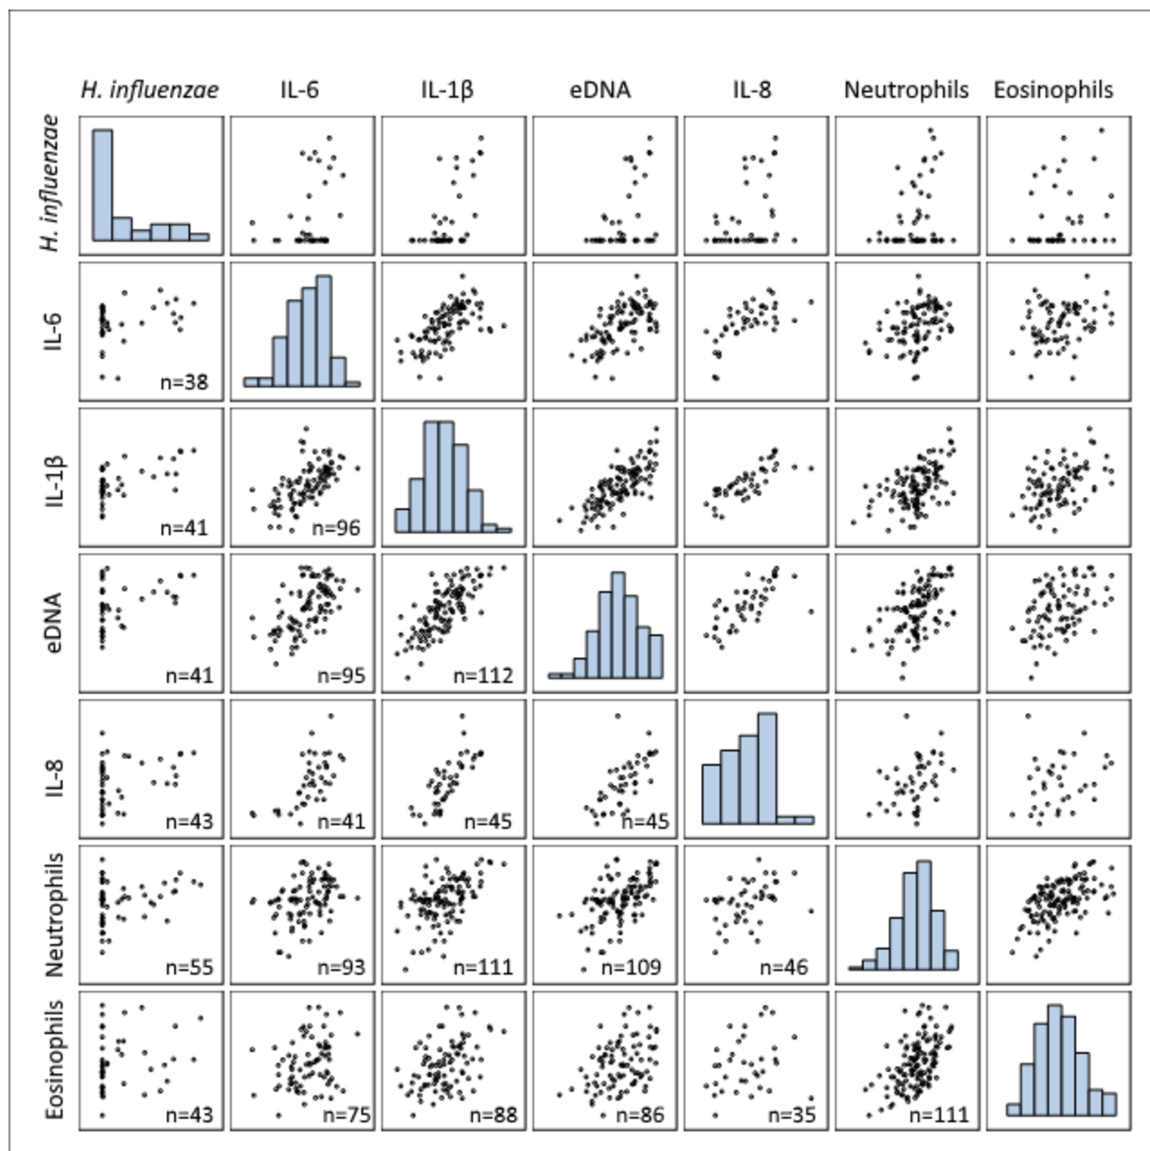

**Supplementary Figure 2:** Scatter plot matrix of inflammatory mediators and *Haemophilus influenzae* in non-eosinophilic asthma. X-axis from left to right and y-axis from top to bottom display  $\log_{10}$  values of *H. influenzae* (copies/mL), IL-6 (pg/mL), IL-1 $\beta$  (pg/mL), extracellular DNA (ng/mL), IL-8 (pg/mL), neutrophils (count  $\times 10^4$ /mL), and eosinophils (count  $\times 10^4$ /mL)



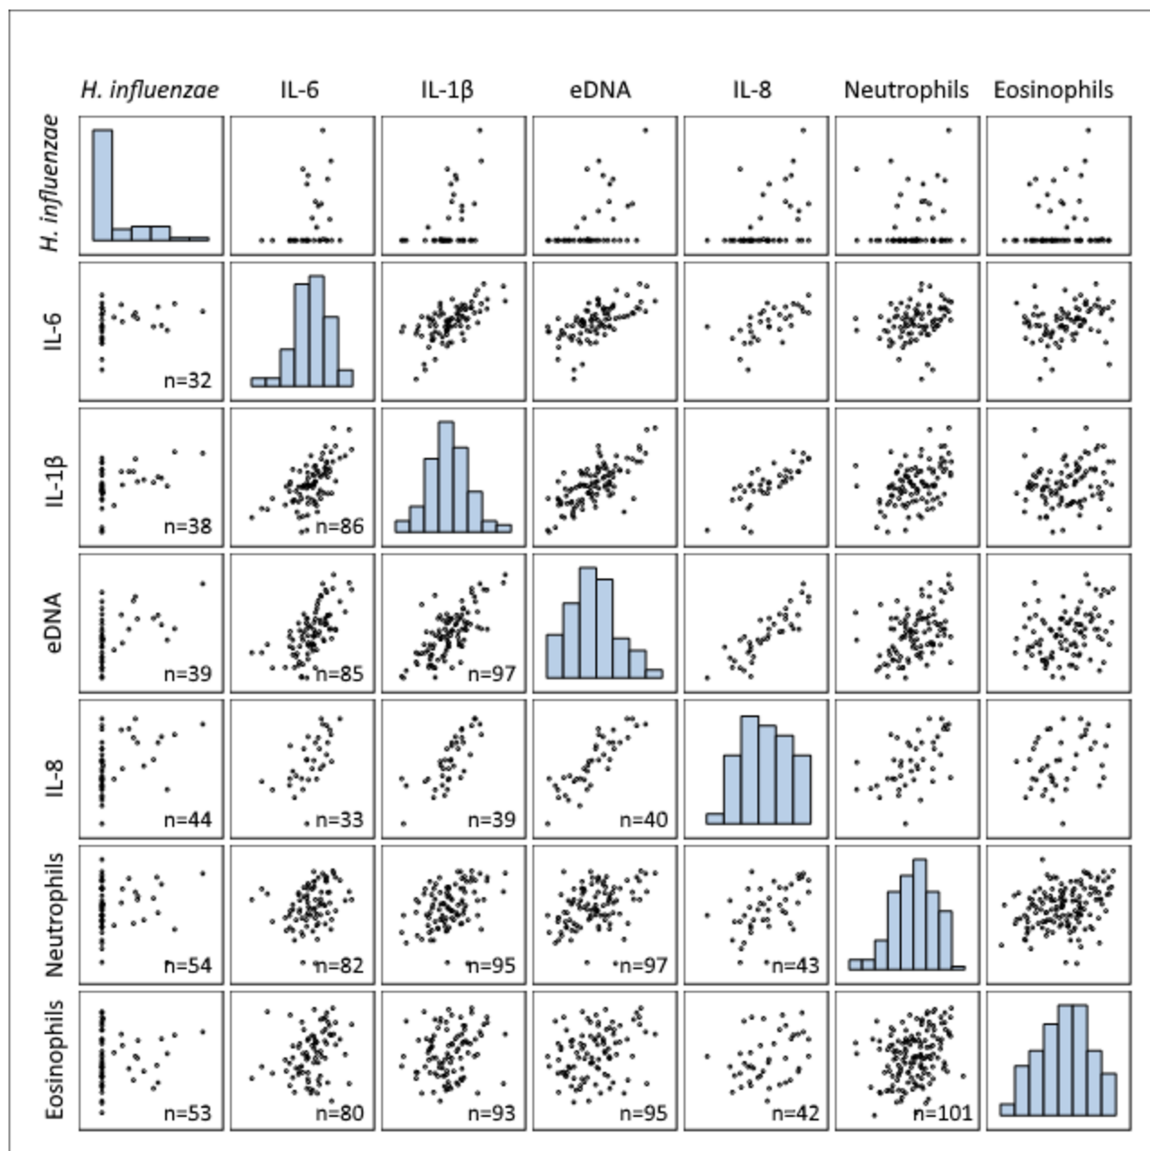

**Supplementary Figure 3:** Scatter plot matrix of inflammatory mediators and *Haemophilus influenzae* in eosinophilic asthma. X-axis from left to right and y-axis from top to bottom display  $\log_{10}$  values of *H. influenzae* (copies/mL), IL-6 (pg/mL), IL-1 $\beta$  (pg/mL), extracellular DNA (ng/mL), IL-8 (pg/mL), neutrophils (count  $\times 10^4$ /mL), and eosinophils (count  $\times 10^4$ /mL)

**Supplementary Table 1.** Azithromycin (AZM) effects on inflammatory mediators and *Haemophilus influenzae* in all, eosinophilic and non-eosinophilic asthma. Estimated difference (95% CI) between AZM and placebo at week 48 is shown.

|                                 | All                      |                           |              | Non-eosinophilic       |                           |              | Eosinophilic           |                          |              |
|---------------------------------|--------------------------|---------------------------|--------------|------------------------|---------------------------|--------------|------------------------|--------------------------|--------------|
|                                 | Observations             | Estimate (95% CI)         | p-value      | Observations           | Estimate (95% CI)         | p-value      | Observations           | Estimate (95% CI)        | p-value      |
| $\log_{10}(H. influenzae)$      | AZM: 23<br>Placebo: 30   | -1.140 (-1.970 to -0.309) | <b>0.007</b> | AZM: 11<br>Placebo: 14 | -2.142 (-3.352 to -0.932) | <b>0.001</b> | AZM: 12<br>Placebo: 16 | 0.017 (-0.940 to 0.975)  | 0.971        |
| $\log_{10}(\text{IL-6})$        | AZM: 91<br>Placebo: 86   | -0.234 (-0.416 to -0.052) | <b>0.012</b> | AZM: 47<br>Placebo: 41 | -0.235 (-0.446 to -0.023) | <b>0.029</b> | AZM: 39<br>Placebo: 43 | -0.292 (-0.57 to -0.015) | <b>0.039</b> |
| $\log_{10}(\text{IL-1}\beta)$   | AZM: 108<br>Placebo: 100 | -0.268 (-0.423 to -0.114) | <b>0.001</b> | AZM: 57<br>Placebo: 47 | -0.393 (-0.627 to -0.158) | <b>0.001</b> | AZM: 44<br>Placebo: 50 | -0.130 (-0.341 to 0.081) | 0.227        |
| $\log_{10}(\text{eDNA})$        | AZM: 103<br>Placebo: 98  | -0.139 (-0.229 to -0.049) | <b>0.002</b> | AZM: 54<br>Placebo: 45 | -0.215 (-0.351 to -0.080) | <b>0.002</b> | AZM: 42<br>Placebo: 50 | -0.075 (-0.198 to 0.048) | 0.234        |
| $\log_{10}(\text{Neutrophils})$ | AZM: 92<br>Placebo: 98   | -0.175 (-0.431 to 0.082)  | 0.183        | AZM: 52<br>Placebo: 47 | -0.453 (-0.909 to 0.004)  | 0.052        | AZM: 40<br>Placebo: 51 | 0.042 (-0.188 to 0.273)  | 0.719        |
| $\log_{10}(\text{Eosinophils})$ | AZM: 92<br>Placebo: 98   | -0.024 (-0.507 to 0.459)  | 0.922        | AZM: 52<br>Placebo: 47 | -0.267 (-1.020 to 0.486)  | 0.487        | AZM: 40<br>Placebo: 51 | 0.410 (-0.149 to 0.969)  | 0.151        |

\* All models adjust for the baseline level. Negative values of the difference indicate lower post treatment levels in the AZM group. Eosinophilic asthma was defined as sputum eosinophils  $\geq 3\%$ .

## References

1. Gao P, Gibson PG, Baines KJ, et al. Anti-inflammatory deficiencies in neutrophilic asthma: reduced galectin-3 and IL-1RA/IL-1 $\beta$ . *Respiratory research*. 2015;16(1):5.
2. Fu JJ, McDonald VM, Gibson PG, Simpson JL. Systemic Inflammation in Older Adults With Asthma-COPD Overlap Syndrome. *Allergy Asthma Immunol Res*. 2014;6(4):316-324.
3. Neveu WA, Allard JL, Raymond DM, et al. Elevation of IL-6 in the allergic asthmatic airway is independent of inflammation but associates with loss of central airway function. *Respiratory research*. 2010;11:28.
4. Wright TK, Gibson PG, Simpson JL, McDonald VM, Wood LG, Baines KJ. Neutrophil extracellular traps are associated with inflammation in chronic airway disease. *Respirology*. 2016;21(3):467-475.
5. Taylor SL, Leong LEX, Choo JM, et al. Inflammatory phenotypes in patients with severe asthma are associated with distinct airway microbiology. *Journal of Allergy and Clinical Immunology*. 2018;141(1):94-103.e115.
6. Taylor SL, Leong LEX, Mobegi FM, et al. Long-Term Azithromycin Reduces Haemophilus influenzae and Increases Antibiotic Resistance in Severe Asthma. *Am J Respir Crit Care Med*. 2019.
7. Reddington K, Schwenk S, Tuite N, et al. Comparison of Established Diagnostic Methodologies and a Novel Bacterial smpB Real-Time PCR Assay for Specific Detection of Haemophilus influenzae Isolates Associated with Respiratory Tract Infections. *Journal of clinical microbiology*. 2015;53(9):2854-2860.
